# Supplementary material for: Hyper-IgE and Carcinoma in CADINS Disease
Source: PubMed Central journal article supplement (PMC9149281; doi:10.3389/fimmu.2022.878989), 2022-05-16
Supplement: DataSheet_1.pdf [file DataSheet_1.pdf]

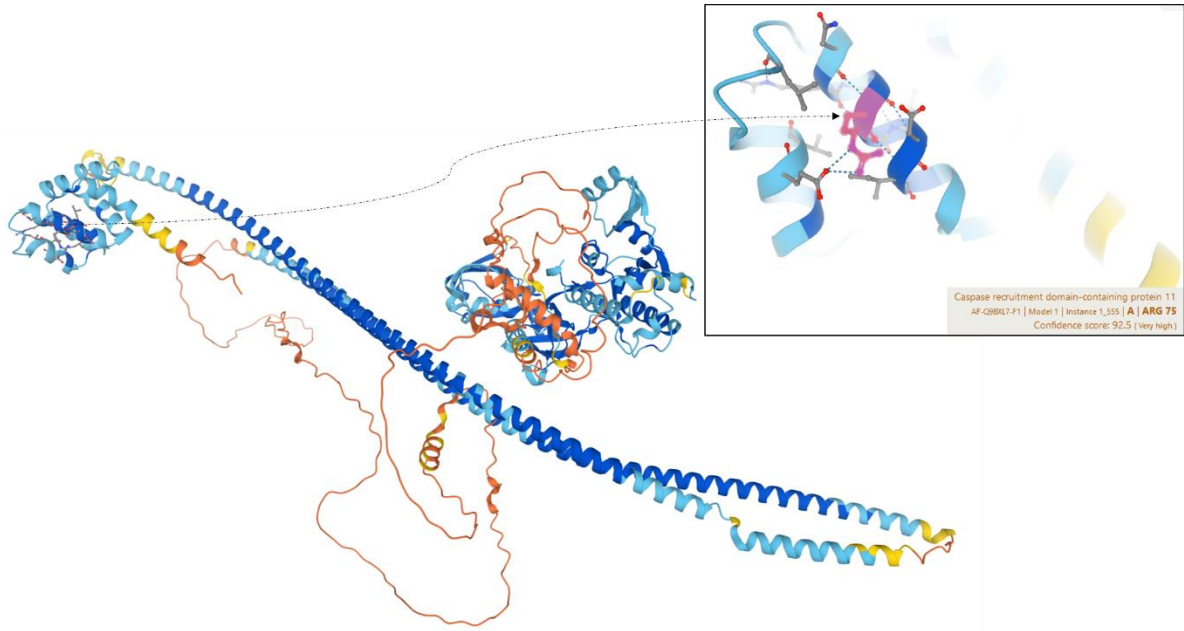

Suppl. Figure 1

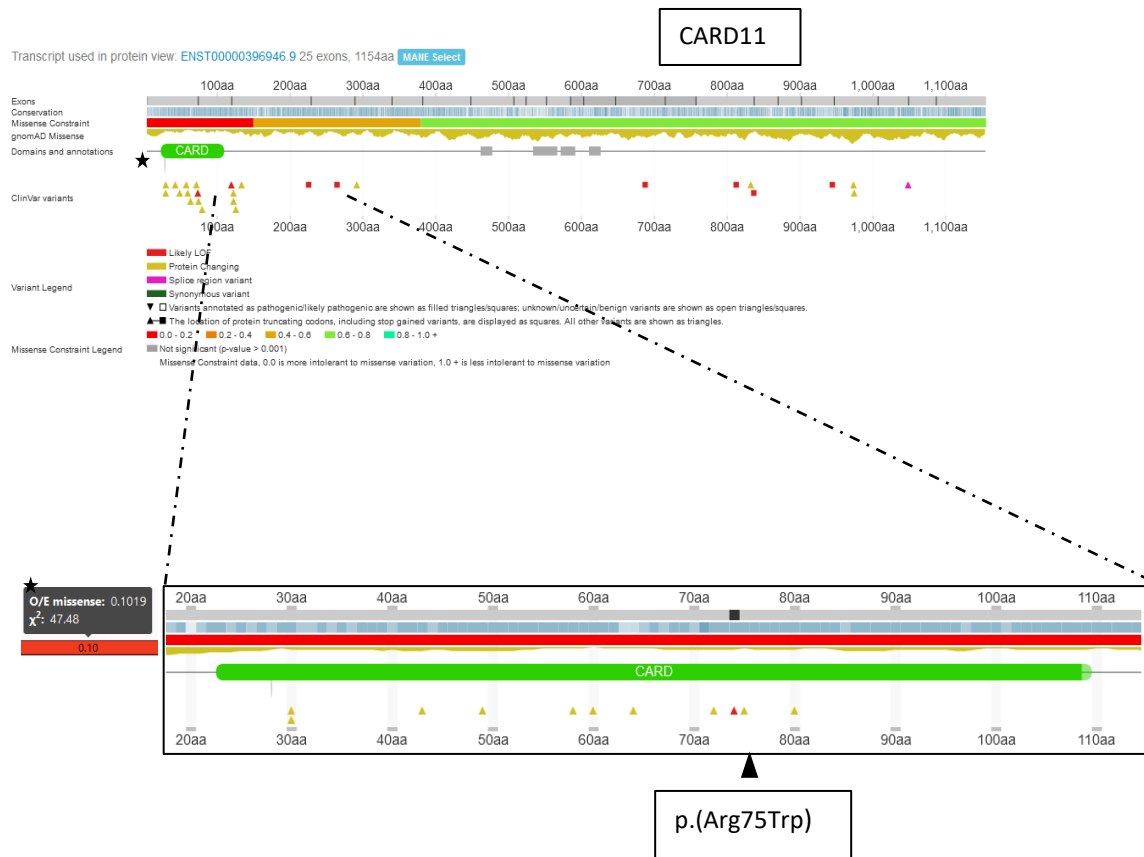

Suppl. Figure 2
